# Supplementary material
Source: Springer Nature journal article supplement (https://www.springermedizin.de/resource/supplementary/13045_2010_93_MOESM1_ESM.pdf/9660740)

Proportion of Progression-Free Survival

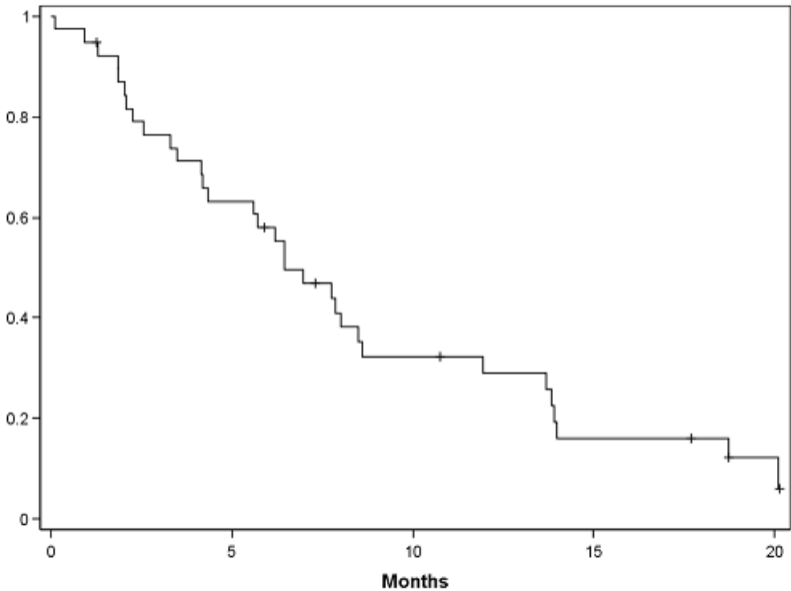

Supplement: MOESM1 [file 9660740]
